# Supplementary material for: B-Cell Receptor Signaling Is Thought to Be a Bridge between Primary Sjogren Syndrome and Diffuse Large B-Cell Lymphoma
Source: Int J Mol Sci. 2023 May 7;24(9):8385. doi: 10.3390/ijms24098385 (PMC10179133; doi:10.3390/ijms24098385)
Supplement: Supplementary file 1 [file ijms-24-08385-s001.zip › tables.xlsx]

## Sheet: 1st dataset
ID	name	collection	Number.of.genes	References
D1	B cell receptor signaling pathway	GO:0050853	65	GEO term
D2	negative regulation of B cell receptor signaling pathway	GO:0050859	13	GEO term
D3	positive regulation of B cell receptor signaling pathway	GO:0050861	14	GEO term
D4	phosphatidylinositol 3-kinase signaling (PI3K)	GO:0014065	48	GEO term
D5	PI3K-Akt signaling pathway	GO:0043491	55	GEO term
D6	Activated NTRK2 signals through PI3K	M27910	7	KEGG pathway
D7	NIK/NF-kappaB signaling	GO:0038061	43	GEO term
D8	NF-kappa B signaling pathway	hsa04064	105	KEGG pathway
D9	PI3K activity	GO:0035004	18	GEO term
D10	positive regulation of PI3K activity	GO:0043552	38	GEO term
D11	negative regulation of PI3K activity	GO:0043553	10	GEO term
D12	positive regulation of PI3K signaling	GO:0014068	87	GEO term
D13	negative regulation of PI3K signaling	GO:0014067	20	GEO term
D14	mTOR signaling pathway	hsa04150	157	KEGG pathway
D15	JAK-STAT signaling pathway	hsa04630	167	KEGG pathway
D16	regulation of JAK-STAT cascade	GO:0046425	12	GEO term

## Sheet: 2nd dataset
ID	category	term.name	description	Size	FDR.value	p.value
D1	KEGG Pathways	hsa04630	JAK-STAT signaling pathway	159	5.07e-156	1.51e-158
D2	KEGG Pathways	hsa04150	mTOR signaling pathway	151	3.1e-148	1.85e-150
D3	GO Biological Process	GO:0007167	Enzyme linked receptor protein signaling pathway	143	5.09e-64	4.44e-66
D4	KEGG Pathways	hsa04151	PI3K-Akt signaling pathway	143	1.1e-99	1.64e-101
D5	GO Biological Process	GO:0007169	Transmembrane receptor protein tyrosine kinase signaling pathway	131	5.69e-69	4.43e-71
D6	STRING Clusters	CL:17997	JAK-STAT signaling pathway	114	1.67e-106	3.68e-110
D7	WikiPathways	WP3932	Focal adhesion: PI3K-Akt-mTOR-signaling pathway	105	2.26e-65	6.66e-68
D8	KEGG Pathways	hsa04064	NF-kappa B signaling pathway	101	1.46e-97	2.6e-99
D9	STRING Clusters	CL:18000	JAK-STAT signaling pathway	94	2.13e-88	1.88e-91
D10	GO Biological Process	GO:1904892	Regulation of receptor signaling pathway via stat	90	1e-74	7.04e-77
D11	GO Biological Process	GO:0046425	Regulation of receptor signaling pathway via jak-stat	88	3.31e-73	2.4e-75
D12	GO Biological Process	GO:0002764	Immune response-regulating signaling pathway	84	9.03e-42	1.37e-43
D13	GO Biological Process	GO:0002768	Immune response-regulating cell surface receptor signaling pathway	83	3.55e-41	5.67e-43
D14	KEGG Pathways	hsa04010	MAPK signaling pathway	83	5.87e-47	3.67e-48
D15	GO Biological Process	GO:0002429	Immune response-activating cell surface receptor signaling pathway	80	1.67e-41	2.58e-43
D16	WikiPathways	WP1449	Regulation of toll-like receptor signaling pathway	77	2.96e-59	1.75e-61
D17	WikiPathways	WP75	Toll-like receptor signaling pathway	68	4.12e-56	4.26e-58
D18	GO Biological Process	GO:0007186	G protein-coupled receptor signaling pathway	67	0.0002	2.48e-05
D19	KEGG Pathways	hsa04014	Ras signaling pathway	67	1.39e-38	1.57e-39
D20	KEGG Pathways	hsa04620	Toll-like receptor signaling pathway	66	6.94e-55	3.51e-56
D21	KEGG Pathways	hsa04062	Chemokine signaling pathway	65	6.19e-41	5.52e-42
D22	STRING Clusters	CL:18486	Mixed, incl. apoptosis modulation and signaling, and nf-kappa b signaling pathway	65	7.22e-41	1.43e-43
D23	WikiPathways	WP3888	VEGFA-VEGFR2 signaling pathway	65	9.31e-23	8.79e-24
D24	GO Biological Process	GO:0050851	Antigen receptor-mediated signaling pathway	63	7.31e-37	1.34e-38
D25	KEGG Pathways	hsa04621	NOD-like receptor signaling pathway	63	1.95e-40	1.85e-41
D26	GO Biological Process	GO:1905114	Cell surface receptor signaling pathway involved in cell-cell signaling	62	7.61e-19	2.68e-20
D27	GO Biological Process	GO:1904894	Positive regulation of receptor signaling pathway via stat	62	2.57e-52	2.98e-54
D28	GO Biological Process	GO:2001233	Regulation of apoptotic signaling pathway	62	3.46e-21	1.11e-22
D29	WikiPathways	WP4754	IL-18 signaling pathway	61	3.08e-29	2.04e-30
D30	GO Biological Process	GO:0046427	Positive regulation of receptor signaling pathway via jak-stat	60	1.2e-50	1.5e-52
D31	WikiPathways	WP382	MAPK signaling pathway	57	6.55e-28	4.93e-29
D32	STRING Clusters	CL:18487	Mixed, incl. nf-kappa b signaling pathway, and card domain	57	2.94e-39	8.41e-42
D33	WikiPathways	WP4538	Regulatory circuits of the STAT3 signaling pathway	57	9.98e-49	1.47e-50
D34	KEGG Pathways	hsa04660	T cell receptor signaling pathway	57	9.04e-45	6.46e-46
D35	GO Biological Process	GO:0016055	Wnt signaling pathway	57	1.03e-20	3.39e-22
D36	GO Biological Process	GO:0097190	Apoptotic signaling pathway	56	9.19e-24	2.72e-25
D37	KEGG Pathways	hsa04668	TNF signaling pathway	56	7.64e-42	6.37e-43
D38	WikiPathways	WP437	EGF/EGFR signaling pathway	55	1.11e-33	4.44e-35
D39	KEGG Pathways	hsa04068	FoxO signaling pathway	55	1.32e-38	1.45e-39
D40	STRING Clusters	CL:18488	Mixed, incl. nf-kappa b signaling pathway, and tir domain	55	1.79e-41	3.14e-44
D41	WikiPathways	WP23	B cell receptor signaling pathway	54	1.4e-41	2.69e-43
D42	WikiPathways	WP3929	Chemokine signaling pathway	54	1.63e-32	6.74e-34
D43	KEGG Pathways	hsa04310	Wnt signaling pathway	54	3.11e-34	4.82e-35
D44	KEGG Pathways	hsa04015	Rap1 signaling pathway	53	1.55e-28	3.28e-29
D45	KEGG Pathways	hsa04066	HIF-1 signaling pathway	51	1.41e-37	1.63e-38
D46	STRING Clusters	CL:18001	Overview of interferons-mediated signaling pathway, and Interleukin-20 family signaling	51	1.53e-46	1.68e-49
D47	KEGG Pathways	hsa04072	Phospholipase D signaling pathway	51	3.51e-32	5.84e-33
D48	WikiPathways	WP2380	Brain-derived neurotrophic factor (BDNF) signaling pathway	50	3.67e-31	1.84e-32
D49	WikiPathways	WP4659	Gastrin signaling pathway	50	8.48e-35	3e-36
D50	WikiPathways	WP2261	Glioblastoma signaling pathways	50	5.32e-40	1.33e-41
D51	WikiPathways	WP2034	Leptin signaling pathway	50	2.53e-41	5.22e-43
D52	KEGG Pathways	hsa04722	Neurotrophin signaling pathway	50	2.19e-35	3e-36
D53	STRING Clusters	CL:18490	NF-kappa B signaling pathway, and TIR domain	49	1.99e-37	6.57e-40
D54	GO Biological Process	GO:0001959	Regulation of cytokine-mediated signaling pathway	49	9.82e-28	2.49e-29
D55	KEGG Pathways	hsa04662	B cell receptor signaling pathway	48	3.85e-39	4.12e-40
D56	STRING Clusters	CL:18491	NF-kappa B signaling pathway, and TIR domain	48	2.85e-37	1e-39
D57	WikiPathways	WP2037	Prolactin signaling pathway	48	6.26e-39	1.66e-40
D58	WikiPathways	WP399	Wnt signaling pathway and pluripotency	48	1.14e-34	4.19e-36
D59	KEGG Pathways	hsa04625	C-type lectin receptor signaling pathway	47	4.31e-34	6.8e-35
D60	WikiPathways	WP673	ErbB signaling pathway	47	2.75e-35	8.1e-37
D61	KEGG Pathways	hsa04910	Insulin signaling pathway	46	4.51e-29	9e-30
D62	UniProt Keywords	KW-0879	Wnt signaling pathway	46	4.98e-22	6.63e-24
D63	KEGG Pathways	hsa04012	ErbB signaling pathway	45	5.54e-35	7.75e-36
D64	GO Biological Process	GO:0038093	Fc receptor signaling pathway	45	5.96e-23	1.81e-24
D65	STRING Clusters	CL:15901	Mixed, incl. gpvi-mediated activation cascade, and t-cell receptor (tcr) signaling pathway	44	1.49e-30	5.89e-33
D66	KEGG Pathways	hsa04917	Prolactin signaling pathway	44	2.05e-36	2.43e-37
D67	KEGG Pathways	hsa04390	Hippo signaling pathway	43	2.87e-24	6.93e-25
D68	WikiPathways	WP69	T-cell receptor (TCR) signaling pathway	43	2.3e-31	1.12e-32
D69	STRING Clusters	CL:18002	Overview of interferons-mediated signaling pathway, and Interleukin-10, conserved site	42	1.38e-38	4.26e-41
D70	KEGG Pathways	hsa04933	AGE-RAGE signaling pathway in diabetic complications	41	1.41e-28	2.93e-29
D71	STRING Clusters	CL:15902	Mixed, incl. gpvi-mediated activation cascade, and t-cell receptor (tcr) signaling pathway	41	1.71e-28	7.16e-31
D72	GO Biological Process	GO:0002221	Pattern recognition receptor signaling pathway	40	1.86e-23	5.56e-25
D73	GO Biological Process	GO:0060070	Canonical wnt signaling pathway	39	1.75e-27	4.47e-29
D74	WikiPathways	WP2374	Oncostatin M signaling pathway	38	4.19e-30	2.41e-31
D75	GO Biological Process	GO:0050852	T cell receptor signaling pathway	38	5.57e-18	2.03e-19
D76	WikiPathways	WP231	TNF-alpha signaling pathway	38	6e-26	4.87e-27
D77	GO Biological Process	GO:0033209	Tumor necrosis factor-mediated signaling pathway	38	1.24e-21	3.93e-23
D78	KEGG Pathways	hsa04152	AMPK signaling pathway	37	3.65e-22	9.88e-23
D79	GO Biological Process	GO:0050853	B cell receptor signaling pathway	37	8.75e-34	1.78e-35
D80	WikiPathways	WP304	Kit receptor signaling pathway	37	4.03e-30	2.26e-31
D81	GO Biological Process	GO:2001234	Negative regulation of apoptotic signaling pathway	37	2.93e-13	1.4e-14
D82	GO Biological Process	GO:2001236	Regulation of extrinsic apoptotic signaling pathway	37	1.24e-17	4.61e-19
D83	KEGG Pathways	hsa04622	RIG-I-like receptor signaling pathway	37	1.15e-28	2.37e-29
D84	KEGG Pathways	hsa04664	Fc epsilon RI signaling pathway	36	2.76e-28	5.92e-29
D85	GO Biological Process	GO:0038095	Fc-epsilon receptor signaling pathway	36	7.58e-21	2.47e-22
D86	WikiPathways	WP395	IL-4 signaling pathway	36	5.13e-30	3.03e-31
D87	WikiPathways	WP4558	Overview of interferons-mediated signaling pathway	36	3.36e-34	1.29e-35
D88	WikiPathways	WP2018	RANKL/RANK signaling pathway	36	7.86e-30	4.87e-31
D89	GO Biological Process	GO:0030111	Regulation of wnt signaling pathway	36	1.25e-07	9.85e-09
D90	WikiPathways	WP2203	Thymic stromal lymphopoietin (TSLP) signaling pathway	36	1.85e-31	8.74e-33
D91	KEGG Pathways	hsa04657	IL-17 signaling pathway	35	1.97e-23	4.88e-24
D92	GO Biological Process	GO:0002224	Toll-like receptor signaling pathway	35	1.46e-21	4.63e-23
D93	KEGG Pathways	hsa04919	Thyroid hormone signaling pathway	34	1.44e-19	4.1e-20
D94	WikiPathways	WP49	IL-2 signaling pathway	33	3.11e-29	2.11e-30
D95	GO Biological Process	GO:0008286	Insulin receptor signaling pathway	33	3.31e-21	1.06e-22
D96	WikiPathways	WP585	Interferon type I signaling pathways	33	6.4e-27	4.95e-28
D97	WikiPathways	WP2332	Interleukin-11 signaling pathway	33	8.7e-29	6.16e-30
D98	WikiPathways	WP127	IL-5 signaling pathway	32	1.5e-28	1.09e-29
D99	GO Biological Process	GO:0097696	Receptor signaling pathway via stat	32	2.51e-28	6.2e-30
D100	GO Biological Process	GO:0097191	Extrinsic apoptotic signaling pathway	31	7.24e-18	2.65e-19
D101	GO Biological Process	GO:0007259	Receptor signaling pathway via jak-stat	31	2.16e-27	5.55e-29
D102	KEGG Pathways	hsa04071	Sphingolipid signaling pathway	31	3.11e-17	9.45e-18
D103	WikiPathways	WP286	IL-3 signaling pathway	30	2.29e-24	1.96e-25
D104	GO Biological Process	GO:0050854	Regulation of antigen receptor-mediated signaling pathway	30	4.65e-21	1.5e-22
D105	KEGG Pathways	hsa04024	cAMP signaling pathway	29	4.74e-10	1.86e-10
D106	GO Biological Process	GO:2001235	Positive regulation of apoptotic signaling pathway	29	1.45e-10	8.38e-12
D107	GO Biological Process	GO:0060828	Regulation of canonical wnt signaling pathway	29	1.9e-06	1.72e-07
D108	WikiPathways	WP4539	Synaptic signaling pathways associated with autism spectrum disorder	29	2.77e-23	2.57e-24
D109	WikiPathways	WP366	TGF-beta signaling pathway	29	4.97e-14	8.87e-15
D110	GO Biological Process	GO:0038127	ERBB signaling pathway	28	1.68e-18	5.98e-20
D111	WikiPathways	WP195	IL-1 signaling pathway	28	2.26e-21	2.47e-22
D112	KEGG Pathways	hsa04926	Relaxin signaling pathway	28	8.5e-14	2.83e-14
D113	KEGG Pathways	hsa04370	VEGF signaling pathway	28	2.73e-21	7.64e-22
D114	WikiPathways	WP4136	Fibrin complement receptor 3 signaling pathway	27	1.29e-22	1.24e-23
D115	WikiPathways	WP364	IL-6 signaling pathway	26	3.7e-21	4.15e-22
D116	WikiPathways	WP2036	TNF-related weak inducer of apoptosis (TWEAK) signaling pathway	26	2.4e-21	2.66e-22
D117	KEGG Pathways	hsa04920	Adipocytokine signaling pathway	25	1.29e-16	3.97e-17
D118	WikiPathways	WP2355	Corticotropin-releasing hormone signaling pathway	25	4.78e-14	8.39e-15
D119	GO Biological Process	GO:0030522	Intracellular receptor signaling pathway	25	1.16e-08	8.16e-10
D120	GO Biological Process	GO:2001237	Negative regulation of extrinsic apoptotic signaling pathway	25	3.12e-12	1.61e-13
D121	GO Biological Process	GO:0002223	Stimulatory c-type lectin receptor signaling pathway	25	7.4e-12	3.93e-13
D122	KEGG Pathways	hsa04371	Apelin signaling pathway	24	1.38e-10	5.2e-11
D123	KEGG Pathways	hsa04915	Estrogen signaling pathway	24	1.79e-10	6.86e-11
D124	GO Biological Process	GO:0097193	Intrinsic apoptotic signaling pathway	24	9.82e-09	6.8e-10
D125	KEGG Pathways	hsa04921	Oxytocin signaling pathway	24	1.34e-09	5.35e-10
D126	WikiPathways	WP138	Androgen receptor signaling pathway	23	1.25e-12	2.44e-13
D127	GO Biological Process	GO:0035567	Non-canonical wnt signaling pathway	23	3.68e-09	2.42e-10
D128	STRING Clusters	CL:18004	Overview of interferons-mediated signaling pathway, and interleukin-6 receptor complex	23	9.64e-21	6.58e-23
D129	GO Biological Process	GO:0046626	Regulation of insulin receptor signaling pathway	23	1.89e-14	8.42e-16
D130	GO Biological Process	GO:0062207	Regulation of pattern recognition receptor signaling pathway	23	1.74e-11	9.53e-13
D131	WikiPathways	WP2032	Thyroid stimulating hormone (TSH) signaling pathway	23	8.71e-15	1.45e-15
D132	GO Biological Process	GO:0060337	Type i interferon signaling pathway	23	4.19e-14	1.9e-15
D133	KEGG Pathways	hsa04020	Calcium signaling pathway	22	1.6e-06	6.98e-07
D134	GO Biological Process	GO:0007173	Epidermal growth factor receptor signaling pathway	22	2.85e-15	1.19e-16
D135	GO Biological Process	GO:0038096	Fc-gamma receptor signaling pathway involved in phagocytosis	22	1.41e-12	7.13e-14
D136	WikiPathways	WP205	IL-7 signaling pathway	22	1.75e-20	2.01e-21
D137	GO Biological Process	GO:2001242	Regulation of intrinsic apoptotic signaling pathway	22	6.44e-07	5.46e-08
D138	WikiPathways	WP363	Wnt signaling pathway	22	1.04e-15	1.66e-16
D139	WikiPathways	WP3981	miRNA regulation of prostate cancer signaling pathways	21	1.4e-17	1.92e-18
D140	WikiPathways	WP4747	Netrin-UNC5B signaling pathway	21	1.39e-14	2.33e-15
D141	GO Biological Process	GO:0031663	Lipopolysaccharide-mediated signaling pathway	20	9.66e-16	3.92e-17
D142	WikiPathways	WP3844	PI3K-AKT-mTOR signaling pathway and therapeutic opportunities	20	4.5e-17	6.44e-18
D143	GO Biological Process	GO:0034121	Regulation of toll-like receptor signaling pathway	20	3.21e-11	1.8e-12
D144	STRING Clusters	CL:18494	TNFR1-induced NFkappaB signaling pathway, and negative regulation of MyD88-independent toll-like receptor signaling pathway	20	6.3e-17	4.99e-19
D145	GO Biological Process	GO:0030178	Negative regulation of wnt signaling pathway	19	0.00085	0.00012
D146	Reactome Pathways	HSA-168643	Nucleotide-binding domain, leucine rich repeat containing receptor (NLR) signaling pathways	19	1.01e-11	4.91e-13
D147	GO Biological Process	GO:0090092	Regulation of transmembrane receptor protein serine/threonine kinase signaling pathway	19	0.0028	0.00045
D148	GO Biological Process	GO:0010803	Regulation of tumor necrosis factor-mediated signaling pathway	19	1.52e-11	8.28e-13
D149	GO Biological Process	GO:0048010	Vascular endothelial growth factor receptor signaling pathway	19	2.33e-10	1.37e-11
D150	GO Biological Process	GO:0060071	Wnt signaling pathway, planar cell polarity pathway	19	2.42e-08	1.74e-09
D151	GO Biological Process	GO:0070498	interleukin-1-mediated signaling pathway	18	1.25e-07	9.82e-09
D152	KEGG Pathways	hsa04115	p53 signaling pathway	18	4.69e-10	1.83e-10
D153	GO Biological Process	GO:0030177	Positive regulation of wnt signaling pathway	18	0.00031	4.07e-05
D154	GO Biological Process	GO:0050855	Regulation of b cell receptor signaling pathway	18	4.27e-15	1.82e-16
D155	GO Biological Process	GO:1901184	Regulation of erbb signaling pathway	18	9.42e-08	7.35e-09
D156	Reactome Pathways	HSA-5357956	TNFR1-induced NFkappaB signaling pathway	18	2.99e-14	1.16e-15
D157	WikiPathways	WP244	Alpha 6 beta 4 signaling pathway	17	2.63e-13	4.85e-14
D158	GO Biological Process	GO:0070098	Chemokine-mediated signaling pathway	17	6.48e-08	4.95e-09
D159	KEGG Pathways	hsa04912	GnRH signaling pathway	17	4.73e-08	1.98e-08
D160	GO Biological Process	GO:0060396	Growth hormone receptor signaling pathway	17	2.7e-15	1.13e-16
D161	GO Biological Process	GO:0008630	Intrinsic apoptotic signaling pathway in response to dna damage	17	1.47e-08	1.03e-09
D162	GO Biological Process	GO:0090090	Negative regulation of canonical wnt signaling pathway	17	0.00094	0.00013
D163	GO Biological Process	GO:0042058	Regulation of epidermal growth factor receptor signaling pathway	17	1.84e-07	1.48e-08
D164	KEGG Pathways	hsa04022	cGMP-PKG signaling pathway	16	0.00023	0.00011
D165	WikiPathways	WP2035	Follicle stimulating hormone (FSH) signaling pathway	16	2.82e-13	5.24e-14
D166	WikiPathways	WP2112	IL-17 signaling pathway	16	1.96e-12	3.87e-13
D167	WikiPathways	WP22	IL-9 signaling pathway	16	1.87e-15	3.06e-16
D168	GO Biological Process	GO:0035666	TRIF-dependent toll-like receptor signaling pathway	16	3.47e-12	1.8e-13
D169	GO Biological Process	GO:0007229	Integrin-mediated signaling pathway	15	1.04e-05	1.04e-06
D170	GO Biological Process	GO:0034122	Negative regulation of toll-like receptor signaling pathway	15	6.74e-10	4.13e-11
D171	WikiPathways	WP61	Notch signaling pathway (Netpath)	15	2.79e-08	7.32e-09
D172	GO Biological Process	GO:0048008	Platelet-derived growth factor receptor signaling pathway	15	2.79e-10	1.66e-11
D173	GO Biological Process	GO:0007178	Transmembrane receptor protein serine/threonine kinase signaling pathway	15	0.0103	0.0019
D174	GO Biological Process	GO:0009755	Hormone-mediated signaling pathway	14	0.0079	0.0014
D175	GO Biological Process	GO:0038111	interleukin-7-mediated signaling pathway	14	3.97e-10	2.39e-11
D176	GO Biological Process	GO:0002755	MyD88-dependent toll-like receptor signaling pathway	14	1.05e-09	6.53e-11
D177	GO Biological Process	GO:0050857	Positive regulation of antigen receptor-mediated signaling pathway	14	2.78e-11	1.54e-12
D178	GO Biological Process	GO:2001244	Positive regulation of intrinsic apoptotic signaling pathway	14	4.9e-07	4.1e-08
D179	GO Biological Process	GO:1902041	Regulation of extrinsic apoptotic signaling pathway via death domain receptors	14	4.12e-07	3.42e-08
D180	STRING Clusters	CL:18495	TNFR1-induced NFkappaB signaling pathway, and TICAM1 deficiency - HSE	14	4.62e-12	4.48e-14
D181	GO Biological Process	GO:0002753	Cytoplasmic pattern recognition receptor signaling pathway	13	4.64e-08	3.47e-09
D182	GO Biological Process	GO:0048013	Ephrin receptor signaling pathway	13	7.93e-05	9.17e-06
D183	GO Biological Process	GO:0038128	ERBB2 signaling pathway	13	7.13e-09	4.85e-10
D184	GO Biological Process	GO:0060397	Growth hormone receptor signaling pathway via jak-stat	13	4.22e-12	2.2e-13
D185	GO Biological Process	GO:1901185	Negative regulation of erbb signaling pathway	13	8.78e-07	7.57e-08
D186	GO Biological Process	GO:0046627	Negative regulation of insulin receptor signaling pathway	13	5.3e-09	3.55e-10
D187	GO Biological Process	GO:0038179	Neurotrophin signaling pathway	13	2.04e-09	1.31e-10
D188	GO Biological Process	GO:2001239	Regulation of extrinsic apoptotic signaling pathway in absence of ligand	13	3.4e-07	2.79e-08
D189	GO Biological Process	GO:0050856	Regulation of t cell receptor signaling pathway	13	1.18e-07	9.24e-09
D190	GO Biological Process	GO:0042059	Negative regulation of epidermal growth factor receptor signaling pathway	12	2.2e-06	2.01e-07
D191	GO Biological Process	GO:1902042	Negative regulation of extrinsic apoptotic signaling pathway via death domain receptors	12	3.55e-07	2.93e-08
D192	GO Biological Process	GO:0048011	Neurotrophin trk receptor signaling pathway	12	1.13e-09	7.06e-11
D193	GO Biological Process	GO:0070423	Nucleotide-binding oligomerization domain containing signaling pathway	12	1.95e-08	1.4e-09
D194	GO Biological Process	GO:0090263	Positive regulation of canonical wnt signaling pathway	12	0.0176	0.0036
D195	GO Biological Process	GO:0001961	Positive regulation of cytokine-mediated signaling pathway	12	3.16e-06	2.94e-07
D196	GO Biological Process	GO:0008593	Regulation of notch signaling pathway	12	0.0013	0.0002
D197	KEGG Pathways	hsa04350	TGF-beta signaling pathway	12	0.00014	6.73e-05
D198	WikiPathways	WP712	Estrogen signaling pathway	11	1.11e-08	2.77e-09
D199	GO Biological Process	GO:0008625	Extrinsic apoptotic signaling pathway via death domain receptors	11	1.06e-06	9.29e-08
D200	GO Biological Process	GO:0035722	interleukin-12-mediated signaling pathway	11	1.14e-05	1.14e-06
D201	STRING Clusters	CL:18111	interleukin-2-mediated signaling pathway, and Trichinosis	11	9.02e-10	9.52e-12
D202	GO Biological Process	GO:0050858	Negative regulation of antigen receptor-mediated signaling pathway	11	3.09e-07	2.52e-08
D203	GO Biological Process	GO:2001240	Negative regulation of extrinsic apoptotic signaling pathway in absence of ligand	11	1.66e-06	1.49e-07
D204	GO Biological Process	GO:2001238	Positive regulation of extrinsic apoptotic signaling pathway	11	2.18e-05	2.28e-06
D205	GO Biological Process	GO:0090100	Positive regulation of transmembrane receptor protein serine/threonine kinase signaling pathway	11	0.0065	0.0011
D206	GO Biological Process	GO:0097192	Extrinsic apoptotic signaling pathway in absence of ligand	10	7.66e-06	7.49e-07
D207	WikiPathways	WP35	G protein signaling pathways	10	0.0023	0.00099
D208	GO Biological Process	GO:0060333	Interferon-gamma-mediated signaling pathway	10	0.001	0.00015
D209	GO Biological Process	GO:0035723	interleukin-15-mediated signaling pathway	10	7.2e-09	4.91e-10
D210	GO Biological Process	GO:0038110	interleukin-2-mediated signaling pathway	10	2.47e-09	1.6e-10
D211	GO Biological Process	GO:0070102	interleukin-6-mediated signaling pathway	10	2.87e-08	2.1e-09
D212	GO Biological Process	GO:0001960	Negative regulation of cytokine-mediated signaling pathway	10	0.0004	5.34e-05
D213	GO Biological Process	GO:2001243	Negative regulation of intrinsic apoptotic signaling pathway	10	0.0095	0.0018
D214	WikiPathways	WP400	p38 MAPK signaling pathway	10	2.01e-06	5.99e-07
D215	GO Biological Process	GO:0007200	Phospholipase c-activating g protein-coupled receptor signaling pathway	10	0.0089	0.0016
D216	GO Biological Process	GO:0060334	Regulation of interferon-gamma-mediated signaling pathway	10	8.84e-07	7.64e-08
D217	GO Biological Process	GO:0043401	Steroid hormone mediated signaling pathway	10	0.0259	0.0057
D218	STRING Clusters	CL:18497	TNFR1-induced NFkappaB signaling pathway	10	7.38e-09	8.61e-11
D219	GO Biological Process	GO:0034142	Toll-like receptor 4 signaling pathway	10	1.35e-07	1.06e-08
D220	GO Biological Process	GO:0007179	Transforming growth factor beta receptor signaling pathway	10	0.0089	0.0016
D221	WikiPathways	WP3658	Wnt/beta-catenin signaling pathway in leukemia	10	2.7e-07	7.64e-08

## Sheet: conserved marker for LDBCL
gene	cluster	avg_log2FC	p_val	p Adj value	pct.1	pct.2
RUBCNL	C1	1.13091	1.11774e-35	6.78023e-31	1	1
ARHGAP17	C1	0.850812	1.26982e-35	7.70273e-31	1	1
NIBAN3	C1	1.31434	3.14169e-33	1.90575e-28	1	1
TCF4	C1	0.923409	1.83326e-31	1.11205e-26	1	1
CARD11	C1	0.760185	1.71712e-30	1.0416e-25	1	1
CD37	C1	0.83105	1.92395e-29	1.16707e-24	1	1
IRF4	C1	0.814043	4.75708e-29	2.88564e-24	1	1
BCL2	C1	0.828973	6.78902e-27	4.11822e-22	1	1
PIM2	C1	0.829893	3.79209e-26	2.30028e-21	1	1
SPIB	C1	0.790415	1.47582e-21	8.95235e-17	1	1
OGT	C1	0.847094	3.87499e-20	2.35057e-15	1	1
NAPSB	C1	0.807387	1.49649e-19	9.07774e-15	1	1
FCRL2	C1	0.831132	1.73663e-19	1.05344e-14	1	1
LENG8	C1	0.75628	2.70456e-15	1.64059e-10	1	1
IGHM	C1	0.877343	8.53285e-15	5.17602e-10	1	1
NFATC1	C1	0.796633	1.21443e-12	7.36676e-08	1	1
TCL1A	C1	0.816953	3.38848e-10	2.05545e-05	1	1
FCMR	C1	0.858904	6.94592e-10	4.21339e-05	1	1
IGLV3-19	C1	0.928424	8.13509e-10	4.93474e-05	0.973	0.977
IGLV3-21	C1	1.25208	5.03775e-08	0.0030559	0.953	0.983
COL5A2	C2	1.48761	1.60246e-45	9.72051e-41	1	1
COL1A2	C2	2.51086	8.40973e-45	5.10134e-40	1	1
COL3A1	C2	2.7826	2.12413e-44	1.2885e-39	1	1
COL6A3	C2	1.56478	6.83679e-43	4.1472e-38	1	1
MMP2	C2	1.73659	1.02316e-42	6.20651e-38	1	1
BGN	C2	1.5971	4.47318e-41	2.71343e-36	1	1
COL5A1	C2	1.6642	1.24233e-39	7.53598e-35	1	1
COL1A1	C2	2.81192	1.27896e-39	7.75816e-35	1	1
SPARC	C2	1.6461	1.4028e-38	8.50939e-34	1	1
FN1	C2	2.20009	8.6948e-38	5.27426e-33	1	1
DCN	C2	1.64451	1.38026e-36	8.37268e-32	1	1
LUM	C2	1.48232	1.53858e-33	9.33304e-29	1	1
MMP1	C2	1.40653	1.56973e-14	9.52197e-10	1	0.995
KRT5	C2	1.4058	2.10956e-07	0.0127966	1	0.969
KRT14	C2	1.5698	7.61277e-07	0.0461791	0.615	0.394
KRT6A	C2	1.68276	3.47406e-06	0.210737	0.504	0.303
ZG16B	C2	2.76337	3.46935e-05	1	0.991	0.995
PGC	C2	1.59452	0.000840543	1	0.752	0.728
HTN3	C2	2.3967	0.00357423	1	0.171	0.081
LTF	C2	1.98845	0.00967092	1	1	1
SLAMF7	C3	1.34158	1.60252e-37	9.72088e-33	1	1
CXCL10	C3	1.42413	3.02092e-37	1.83249e-32	1	1
C1QB	C3	1.82587	5.23868e-36	3.17778e-31	1	1
C1QA	C3	1.71043	1.90018e-35	1.15265e-30	1	1
GBP1	C3	1.4001	4.24456e-35	2.57475e-30	1	1
C1QC	C3	1.56113	8.51628e-34	5.16597e-29	1	1
GBP5	C3	1.38898	9.47529e-34	5.74771e-29	1	1
CXCL9	C3	1.94671	1.43926e-31	8.73053e-27	1	1
B2M	C3	1.13369	3.94322e-31	2.39196e-26	1	1
FTL	C3	1.21195	5.77015e-31	3.50017e-26	1	1
VSIG4	C3	1.15607	2.94909e-30	1.78892e-25	1	1
NKG7	C3	1.12581	3.97371e-27	2.41045e-22	1	1
MT1G	C3	1.28986	5.71207e-27	3.46494e-22	1	0.995
CD163	C3	1.3262	1.22791e-26	7.44848e-22	1	1
CTSB	C3	1.12119	4.01738e-26	2.43694e-21	1	1
MT2A	C3	1.24312	2.32447e-21	1.41003e-16	1	1
CCL18	C3	1.25732	3.47803e-19	2.10977e-14	1	1
CHI3L1	C3	1.4244	8.36525e-16	5.07436e-11	1	1
CHIT1	C3	1.11389	3.89767e-05	1	1	1
IGKV3-11	C3	1.55255	0.00356973	1	1	0.98
MARCKSL1	C4	1.08681	4.59554e-25	2.78766e-20	1	1
RPL8	C4	0.820104	1.90391e-24	1.15491e-19	1	1
VPREB3	C4	0.880723	1.87491e-22	1.13732e-17	1	1
STAG3	C4	1.09458	4.32641e-22	2.6244e-17	1	1
RPS5	C4	0.82716	3.9215e-19	2.37878e-14	1	1
RPS16	C4	1.0881	5.18551e-19	3.14553e-14	1	1
RPL36	C4	0.814759	1.09002e-18	6.61208e-14	1	1
HMGN1	C4	0.811475	1.31355e-18	7.96799e-14	1	1
RPS20	C4	0.795416	1.51318e-18	9.17893e-14	1	1
HMCES	C4	1.02778	5.56666e-17	3.37674e-12	1	1
CD79B	C4	1.04753	9.19788e-17	5.57943e-12	1	1
RPS19	C4	0.790599	2.68245e-16	1.62717e-11	1	1
SERPINA9	C4	1.07274	8.09419e-16	4.90993e-11	0.963	0.909
RPL28	C4	0.777023	9.25628e-16	5.61486e-11	1	1
RASL11A	C4	0.880192	2.5203e-15	1.52881e-10	1	1
RPL18AP3	C4	0.95384	3.25153e-15	1.97238e-10	1	1
RPLP2	C4	0.815094	1.03759e-14	6.29401e-10	1	1
AC243919.1	C4	0.790053	1.23183e-12	7.47229e-08	1	1
AC073861.1	C4	0.813291	1.44653e-11	8.77467e-07	1	1
RPL13AP5	C4	1.138	9.14265e-10	5.54593e-05	1	1
FDCSP	C5	0.977018	9.1764e-17	5.56641e-12	1	0.975
RASGRP2	C5	0.746754	1.28525e-16	7.79634e-12	1	1
JAK3	C5	0.659688	4.28746e-16	2.60077e-11	1	1
LTB	C5	1.11079	1.27692e-15	7.74579e-11	1	1
CLU	C5	1.28562	1.54889e-14	9.39557e-10	1	1
ITGAX	C5	0.693462	2.70871e-13	1.6431e-08	1	1
ANO9	C5	0.63145	4.56521e-13	2.76926e-08	1	1
CD19	C5	0.623263	9.29952e-13	5.64109e-08	1	1
CCL21	C5	1.56984	7.78992e-12	4.72536e-07	1	0.995
BANK1	C5	0.611862	1.12899e-11	6.84843e-07	1	1
CCL19	C5	0.648741	1.33119e-11	8.07503e-07	1	1
ARHGEF1	C5	0.601287	1.4031e-11	8.51118e-07	1	1
TMC8	C5	0.619869	6.24282e-10	3.78689e-05	1	1
CR2	C5	0.997873	9.7937e-10	5.94086e-05	1	1
PGGHG	C5	0.657612	7.69084e-07	0.0466526	1	1
IGHG3	C5	1.19042	1.60039e-05	0.970799	1	1
IGHG1	C5	0.650342	2.22473e-05	1	1	1
IGHGP	C5	0.864038	0.00108834	1	1	0.998
CD99	C5	0.891931	0.00198595	1	1	1
IGKV4-1	C5	0.804146	0.00432752	1	1	0.995

## Sheet: Variable Features
rows	related patway in dataset	Gene Symbol
1	B_cell_receptor_signaling_pathway	IGLC3
2	B_cell_receptor_signaling_pathway	BCL2
3	B_cell_receptor_signaling_pathway	BANK1
4	B_cell_receptor_signaling_pathway	NFAM1
5	B_cell_receptor_signaling_pathway	CD79B
6	B_cell_receptor_signaling_pathway	KLHL6
7	B_cell_receptor_signaling_pathway	IGLC6
8	B_cell_receptor_signaling_pathway	BLK
9	B_cell_receptor_signaling_pathway	LCK
10	B_cell_receptor_signaling_pathway	NFKBIZ
11	B_cell_receptor_signaling_pathway	MNDA
12	B_cell_receptor_signaling_pathway	CTLA4
13	B_cell_receptor_signaling_pathway	IGHM
14	B_cell_receptor_signaling_pathway	IGHA1
15	B_cell_receptor_signaling_pathway	IGKC
16	B_cell_receptor_signaling_pathway	IGHG1
17	B_cell_receptor_signaling_pathway	IGLC7
18	B_cell_receptor_signaling_pathway	SH2B2
19	B_cell_receptor_signaling_pathway	IGHD
20	B_cell_receptor_signaling_pathway	IGHA2
21	B_cell_receptor_signaling_pathway	IGHG4
22	B_cell_receptor_signaling_pathway	IGHG3
23	B_cell_receptor_signaling_pathway	IGHG2
24	B_cell_receptor_signaling_pathway	IGHE
25	B_cell_receptor_signaling_pathway	ITK
26	negative_regulation_of_B_cell_receptor_signaling_pathway	CD300A
27	negative_regulation_of_B_cell_receptor_signaling_pathway	FCGR2B
28	negative_regulation_of_B_cell_receptor_signaling_pathway	FCRL3
29	negative_regulation_of_B_cell_receptor_signaling_pathway	CD22
30	positive_regulation_of_B_cell_receptor_signaling_pathway	FOXP1
31	positive_regulation_of_B_cell_receptor_signaling_pathway	NFAM1
32	positive_regulation_of_B_cell_receptor_signaling_pathway	STAP1
33	phosphatidylinositol_3_kinase_signaling_(PI3K)	ERBB2
34	phosphatidylinositol_3_kinase_signaling_(PI3K)	CD28
35	phosphatidylinositol_3_kinase_signaling_(PI3K)	ERBB3
36	phosphatidylinositol_3_kinase_signaling_(PI3K)	PIK3C2G
37	phosphatidylinositol_3_kinase_signaling_(PI3K)	PRR5
38	phosphatidylinositol_3_kinase_signaling_(PI3K)	SERPINA12
39	phosphatidylinositol_3_kinase_signaling_(PI3K)	PIK3C2B
40	phosphatidylinositol_3_kinase_signaling_(PI3K)	LTK
41	phosphatidylinositol_3_kinase_signaling_(PI3K)	FCGR3A
42	PI3K_Akt_signaling_pathway	BANK1
43	PI3K_Akt_signaling_pathway	CD28
44	PI3K_Akt_signaling_pathway	AXL
45	PI3K_Akt_signaling_pathway	ADTRP
46	PI3K_Akt_signaling_pathway	MT3
47	PI3K_Akt_signaling_pathway	LOX
48	PI3K_Akt_signaling_pathway	SOX9
49	PI3K_Akt_signaling_pathway	TNF
50	PI3K_Akt_signaling_pathway	PAX2
51	PI3K_Akt_signaling_pathway	IL1B
52	PI3K_Akt_signaling_pathway	PIK3C2B
53	PI3K_Akt_signaling_pathway	EPHA2
54	PI3K_Akt_signaling_pathway	SMPD3
55	PI3K_Akt_signaling_pathway	GAS6
56	PI3K_Akt_signaling_pathway	TMEM100
57	PI3K_Akt_signaling_pathway	CCL5
58	PI3K_Akt_signaling_pathway	CCL2
59	Activated_NTRK2_signals_through_PI3K	GAB1
60	Activated_NTRK2_signals_through_PI3K	NTRK2
61	NIK/NF_kappaB_signaling	REL
62	NIK/NF_kappaB_signaling	ALK
63	NIK/NF_kappaB_signaling	CHI3L1
64	NF_kappa_B_signaling_pathway	LCK
65	NF_kappa_B_signaling_pathway	ZAP70
66	NF_kappa_B_signaling_pathway	BCL10
67	NF_kappa_B_signaling_pathway	IL1B
68	NF_kappa_B_signaling_pathway	IL1R1
69	NF_kappa_B_signaling_pathway	TNF
70	NF_kappa_B_signaling_pathway	LBP
71	NF_kappa_B_signaling_pathway	CD14
72	NF_kappa_B_signaling_pathway	LY96
73	NF_kappa_B_signaling_pathway	LTA
74	NF_kappa_B_signaling_pathway	LTB
75	NF_kappa_B_signaling_pathway	TNFSF13B
76	NF_kappa_B_signaling_pathway	TNFRSF13C
77	NF_kappa_B_signaling_pathway	BCL2L1
78	NF_kappa_B_signaling_pathway	BCL2
79	NF_kappa_B_signaling_pathway	GADD45A
80	NF_kappa_B_signaling_pathway	TRAF1
81	NF_kappa_B_signaling_pathway	BCL2A1
82	NF_kappa_B_signaling_pathway	CXCL8
83	NF_kappa_B_signaling_pathway	PTGS2
84	NF_kappa_B_signaling_pathway	CCL4
85	NF_kappa_B_signaling_pathway	CCL4L2
86	NF_kappa_B_signaling_pathway	CXCL1
87	NF_kappa_B_signaling_pathway	CXCL2
88	NF_kappa_B_signaling_pathway	CXCL3
89	NF_kappa_B_signaling_pathway	PLAU
90	NF_kappa_B_signaling_pathway	CCL13
91	NF_kappa_B_signaling_pathway	CCL19
92	NF_kappa_B_signaling_pathway	CCL21
93	NF_kappa_B_signaling_pathway	CXCL12
94	PI3K_signaling	ERBB2
95	PI3K_signaling	CD28
96	PI3K_signaling	ERBB3
97	PI3K_signaling	PIK3C2G
98	PI3K_signaling	PRR5
99	PI3K_signaling	SERPINA12
100	PI3K_signaling	PIK3C2B
101	PI3K_signaling	LTK
102	PI3K_signaling	FCGR3A
103	PI3K_activity	PIK3C2G
104	PI3K_activity	PIK3C2B
105	positive_regulation_of_PI3K_activity	FLT3
106	positive_regulation_of_PI3K_activity	CCR7
107	positive_regulation_of_PI3K_activity	CCL19
108	positive_regulation_of_PI3K_activity	PDGFRA
109	positive_regulation_of_PI3K_activity	CCL21
110	positive_regulation_of_PI3K_activity	FGFR3
111	positive_regulation_of_PI3K_activity	FGR
112	positive_regulation_of_PI3K_activity	SRC
113	positive_regulation_of_PI3K_activity	PDGFRB
114	positive_regulation_of_PI3K_activity	P2RY12
115	positive_regulation_of_PI3K__signaling	ERBB4
116	positive_regulation_of_PI3K__signaling	FLT3
117	positive_regulation_of_PI3K__signaling	CD28
118	positive_regulation_of_PI3K__signaling	EGF
119	positive_regulation_of_PI3K__signaling	FGFR1
120	positive_regulation_of_PI3K__signaling	SOX9
121	positive_regulation_of_PI3K__signaling	ERBB3
122	positive_regulation_of_PI3K__signaling	AGT
123	positive_regulation_of_PI3K__signaling	PRR5
124	positive_regulation_of_PI3K__signaling	INSR
125	positive_regulation_of_PI3K__signaling	TNF
126	positive_regulation_of_PI3K__signaling	MYOC
127	positive_regulation_of_PI3K__signaling	GPER1
128	positive_regulation_of_PI3K__signaling	SERPINA12
129	positive_regulation_of_PI3K__signaling	PDGFRA
130	positive_regulation_of_PI3K__signaling	F2RL1
131	positive_regulation_of_PI3K__signaling	DCN
132	positive_regulation_of_PI3K__signaling	NTRK2
133	positive_regulation_of_PI3K__signaling	OSM
134	positive_regulation_of_PI3K__signaling	FGR
135	positive_regulation_of_PI3K__signaling	PDGFD
136	positive_regulation_of_PI3K__signaling	FN1
137	positive_regulation_of_PI3K__signaling	SRC
138	positive_regulation_of_PI3K__signaling	DDR1
139	positive_regulation_of_PI3K__signaling	PDGFRB
140	positive_regulation_of_PI3K__signaling	PDGFA
141	positive_regulation_of_PI3K__signaling	CSF3
142	positive_regulation_of_PI3K__signaling	CCL5
143	negative_regulation_of_PI3K__signaling	SERPINE2
144	protein_kinase_B_signaling_(AKT_cascade_)	BANK1
145	protein_kinase_B_signaling_(AKT_cascade_)	CD28
146	protein_kinase_B_signaling_(AKT_cascade_)	AXL
147	protein_kinase_B_signaling_(AKT_cascade_)	ADTRP
148	protein_kinase_B_signaling_(AKT_cascade_)	MT3
149	protein_kinase_B_signaling_(AKT_cascade_)	LOX
150	protein_kinase_B_signaling_(AKT_cascade_)	SOX9
151	protein_kinase_B_signaling_(AKT_cascade_)	TNF
152	protein_kinase_B_signaling_(AKT_cascade_)	PAX2
153	protein_kinase_B_signaling_(AKT_cascade_)	IL1B
154	protein_kinase_B_signaling_(AKT_cascade_)	PIK3C2B
155	protein_kinase_B_signaling_(AKT_cascade_)	EPHA2
156	protein_kinase_B_signaling_(AKT_cascade_)	SMPD3
157	protein_kinase_B_signaling_(AKT_cascade_)	GAS6
158	protein_kinase_B_signaling_(AKT_cascade_)	TMEM100
159	protein_kinase_B_signaling_(AKT_cascade_)	CCL5
160	protein_kinase_B_signaling_(AKT_cascade_)	CCL2
161	mTOR_signaling_pathway	SLC7A5
162	mTOR_signaling_pathway	LAMTOR4
163	mTOR_signaling_pathway	RRAGD
164	mTOR_signaling_pathway	PRKAA2
165	mTOR_signaling_pathway	DDIT4
166	mTOR_signaling_pathway	WNT2
167	mTOR_signaling_pathway	WNT3
168	mTOR_signaling_pathway	WNT3A
169	mTOR_signaling_pathway	WNT4
170	mTOR_signaling_pathway	WNT5A
171	mTOR_signaling_pathway	WNT5B
172	mTOR_signaling_pathway	WNT7A
173	mTOR_signaling_pathway	WNT7B
174	mTOR_signaling_pathway	WNT8A
175	mTOR_signaling_pathway	WNT10A
176	mTOR_signaling_pathway	WNT11
177	mTOR_signaling_pathway	TNF
178	mTOR_signaling_pathway	INSR
179	mTOR_signaling_pathway	RPS6KA6
180	mTOR_signaling_pathway	PRR5
181	mTOR_signaling_pathway	PRKCG
182	JAK_STAT_signaling_pathway	IL4
183	JAK_STAT_signaling_pathway	IL21
184	JAK_STAT_signaling_pathway	IL2RA
185	JAK_STAT_signaling_pathway	IL2RB
186	JAK_STAT_signaling_pathway	IL7R
187	JAK_STAT_signaling_pathway	CSF2
188	JAK_STAT_signaling_pathway	IL5RA
189	JAK_STAT_signaling_pathway	IL6
190	JAK_STAT_signaling_pathway	IL11
191	JAK_STAT_signaling_pathway	OSM
192	JAK_STAT_signaling_pathway	LIF
193	JAK_STAT_signaling_pathway	IL6R
194	JAK_STAT_signaling_pathway	IL13RA2
195	JAK_STAT_signaling_pathway	CNTFR
196	JAK_STAT_signaling_pathway	IL10
197	JAK_STAT_signaling_pathway	IL20RA
198	JAK_STAT_signaling_pathway	IL20RB
199	JAK_STAT_signaling_pathway	IL22RA2
200	JAK_STAT_signaling_pathway	IL12B
201	JAK_STAT_signaling_pathway	IL12RB2
202	JAK_STAT_signaling_pathway	CSH2
203	JAK_STAT_signaling_pathway	PRL
204	JAK_STAT_signaling_pathway	THPO
205	JAK_STAT_signaling_pathway	CSF3
206	JAK_STAT_signaling_pathway	GHR
207	JAK_STAT_signaling_pathway	CSF3R
208	JAK_STAT_signaling_pathway	IFNA2
209	JAK_STAT_signaling_pathway	IFNA21
210	JAK_STAT_signaling_pathway	IFNW1
211	JAK_STAT_signaling_pathway	IFNG
212	JAK_STAT_signaling_pathway	IFNGR1
213	JAK_STAT_signaling_pathway	EGF
214	JAK_STAT_signaling_pathway	PDGFA
215	JAK_STAT_signaling_pathway	EGFR
216	JAK_STAT_signaling_pathway	PDGFRA
217	JAK_STAT_signaling_pathway	PDGFRB
218	JAK_STAT_signaling_pathway	SOCS1
219	JAK_STAT_signaling_pathway	SOCS2
220	JAK_STAT_signaling_pathway	SOCS3
221	JAK_STAT_signaling_pathway	BCL2
222	JAK_STAT_signaling_pathway	BCL2L1
223	JAK_STAT_signaling_pathway	MYC
224	JAK_STAT_signaling_pathway	CCND1
225	JAK_STAT_signaling_pathway	CCND2
226	JAK_STAT_signaling_pathway	CDKN1A
227	JAK_STAT_signaling_pathway	GFAP
228	JAK_STAT_signaling_pathway	FHL1
229	regulation_of_JAK_STAT_cascade	IL22RA2
230	regulation_of_JAK_STAT_cascade	SOCS1

## Sheet: PC analysis 
Result of Performing linear dimensional reduction and the first variable genea in different principal component
PC_ 1					PC_ 2					PC_ 3					PC_ 4					PC_ 5
Positive:		Negative:			Positive:		Negative:			Positive:		Negative:			Positive:		Negative:			Positive:		Negative:
TYROBP		IL7R			S100A8		NKG7			CD79A		NKG7			DNAJB1		FCGR3A			SDPR		DNAJB1
FTH1		LEF1			VCAN		CST7			CD74		FCGR3A			HSPA1B		MS4A7			GNG11		HSPA1B
CTSS		TCF7			S100A12		GZMA			MS4A1		CST7			GADD45B		LST1			NRGN		DUSP1
S100A6		CCR7			CD14		CTSW			BANK1		FGFBP2			TNFAIP3		LINC01272			SPARC		CXCR4
GABARAP		MAL			CCR7		PRF1			LINC00926		PRF1			HSPA1A		CDKN1C			TUBB1		PPP1R15A
FTL		IL32			S100A9		PFN1			FAM129C		CTSW			HSP90AA1		MTSS1			C6orf25		GADD45B
PSAP		ABLIM1			CSF3R		GZMB			BLNK		IFITM2			DUSP2		SIGLEC10			PF4		DUSP2
S100A11		LTB			RBP7		GNLY			CD79B		KLRD1			NR4A2		CD79B			PPBP		BTG2
SPI1		TRBC1			CLEC4E		KLRD1			RALGPS2		GNLY			FOSB		HES4			GP9		NFKBIZ
OAZ1		CD69			LEF1		FGFBP2			RPLP0		SPON2			DDIT4		TCF7L2			CLU		HSPA1A
AIF1		CST7			FCN1		C12orf75			AFF3		GZMH			SLC2A3		RHOC			CMTM5		HSP90AA1
FCN1		NELL2			CSTA		CCL5			FCER2		GZMA			PPP1R15A		LRRC25			PTGS1		NR4A1
CST3		NKG7			MAL		HOPX			TCL1A		KLRF1			IER3		CD79A			F13A1		HSPH1
FCER1G		CCL5			CDA		GZMH			HERPUD1		S1PR5			SOCS3		CSF1R			TREML1		TNFAIP3
CD68		CTSW			NCF1		SPON2			MEF2C		PRSS23			HSPH1		IFITM3			HIST1H2AC		NR4A2
COTL1		CD8B			FPR1		IFITM2			GNG7		GZMB			BHLHE40		LILRB1			RGS18		JUN
NPC2		KLRB1			SLC11A1		KLRF1			HLA-DOB		CCL5			VCAN		PTPN6			AP003068.23		ZFP36
TSPO		GZMH			ASGR1		S1PR5			HLA-DMA		HOPX			PPIF		CUX1			TMEM40		CD69
SERPINA1		CD8A			LYZ		CALR			HLA-DRA		TYROBP			SRGN		LILRB2			MAP3K7CL		IER2
TKT		BACH2			MNDA		CLIC3			FCRLA		SH2D1B			JUN		SERPINA1			C2orf88		RPS18
PC_ 6					PC_ 7					PC_ 8					PC_ 9					PC_ 10
Positive:		Negative:			Positive:		Negative:			Positive:		Negative:			Positive:		Negative:			Positive:		Negative:
RPS18		GZMB			PPP1R15A		RPLP0			SOD2		HLA-DPA1			ITM2C		HLA-DQB1			PPIF		JUNB
IL7R		NKG7			GADD45B		GAPDH			S100A8		FCER1A			C1orf186		HLA-DPB1			VEGFA		IL7R
RPLP0		PRF1			ZFP36		CD27			CD79A		HLA-DQA1			IRF7		HLA-DRB1			HSPA1A		LTB
LEF1		FGFBP2			NR4A1		TMSB10			S100A12		HLA-DPB1			LILRA4		HLA-DRA			STMN1		KLRB1
TCF7		CST7			NFKBIA		TXNDC17			NCF1		CST3			UGCG		HLA-DQA1			TYMS		RPS18
DNAJB1		SPON2			DUSP2		S100A10			NFKBIA		GSN			TCF4		HLA-DPA1			C15orf48		IL32
LIMS1		GNLY			IER2		ARPC1B			LINC00936		CLEC10A			PPP1R14B		CLEC10A			HSP90AA1		CD69
TUBA4A		KLRF1			HSPA1B		H2AFV			CD14		HLA-DRA			CCDC50		LINC00926			ATF3		CXCR4
CD27		KLRD1			HSPA1A		PRDX3			S100A9		HLA-DRB1			SERPINF1		LY86			IER5		CCR6
MAL		CTSW			DNAJB1		VIM			CXCL8		CD74			IL3RA		HLA-DMA			NR4A1		TNFAIP3
HSPD1		CD79A			BTG2		ACTG1			BCL2A1		SAMHD1			CLEC4C		ADAM28			SNAI1		ISG20
COTL1		CLIC3			SDPR		H2AFZ			VCAN		NDRG2			APP		ACTB			TUBA1B		GZMK
HES4		IGFBP7			SQSTM1		TALDO1			CLEC4E		FLT3			TPM2		FCER2			TK1		AQP3
CDKN1C		PRSS23			NR4A2		DUT			RBP7		ENHO			SEC61B		CD1C			CEBPB		KLRG1
FAM110A		LINC00926			CD83		SEC61B			CDA		HLA-DQB1			PTPRS		MS4A1			KIAA0101		JUN
LTB		MS4A1			GNG11		IL32			CD79B		CD1C			SMPD3		HLA-DOB			HBEGF		AHNAK
LST1		MYOM2			HIST1H2AC		SAMHD1			AQP9		HLA-DMA			LRRC26		ANXA1			PHLDA2		KLF6
HIST1H2AC		S1PR5			SPARC		PFN1			THBS1		CLIC2			IRF8		BANK1			RRM2		FOS
HSP90AA1		HOPX			DUSP1		HMGB2			LINC00926		PLD4			IRF4		HLA-DRB5			NAMPT		RPS26
ICOS		TTC38			TUBB1		GRN			MS4A1		HLA-DRB5			PLD4		CD74			ZWINT		IFI6
